# Supplementary material for: Effects of Ultrasound-Assisted Immersion Freezing on the Protein Structure, Physicochemical Properties and Muscle Quality of the Bay Scallop (Argopecten irradians) during Frozen Storage
Source: MDPI journal article supplement (doi:10.3390/foods11203247), 2022-10-18
Supplement: s1 [file s1]

**Table S2.**  $T_{\max}$  ( $^{\circ}\text{C}$ ) and denaturation enthalpy  $\Delta H$  (J/g) corresponding to DSC thermograms of control adductor muscle of scallop (AMS) and 90-day frozen stored AMS with different treatments.

|         | $T_{\max 1}$ ( $^{\circ}\text{C}$ ) | $T_{\max 2}$ ( $^{\circ}\text{C}$ ) | $\Delta H_1$ (J/g)    | $\Delta H_2$ (J/g)   |
|---------|-------------------------------------|-------------------------------------|-----------------------|----------------------|
| Control | $48.19 \pm 0.04^a$                  | $72.26 \pm 0.10^a$                  | $0.84 \pm 0.01^a$     | $0.45 \pm 0.02^a$    |
| AF      | $45.83 \pm 0.08^d$                  | $69.07 \pm 0.07^d$                  | $0.53 \pm 0.02^{de}$  | $0.35 \pm 0.02^b$    |
| IF      | $46.16 \pm 0.07^{cd}$               | $68.22 \pm 0.09^e$                  | $0.58 \pm 0.03^{bcd}$ | $0.37 \pm 0.03^b$    |
| UIF-100 | $47.16 \pm 0.14^b$                  | $67.10 \pm 0.12^f$                  | $0.62 \pm 0.02^b$     | $0.34 \pm 0.01^b$    |
| UIF-125 | $46.23 \pm 0.06^c$                  | $70.19 \pm 0.04^c$                  | $0.57 \pm 0.04^{bcd}$ | $0.38 \pm 0.01^{ab}$ |
| UIF-150 | $46.32 \pm 0.11^{bc}$               | $71.05 \pm 0.06^b$                  | $0.63 \pm 0.02^b$     | $0.39 \pm 0.04^{ab}$ |
| UIF-175 | $45.81 \pm 0.13^d$                  | $70.25 \pm 0.07^c$                  | $0.55 \pm 0.02^{de}$  | $0.36 \pm 0.03^b$    |
| UIF-200 | $46.19 \pm 0.08^c$                  | $67.29 \pm 0.08^f$                  | $0.60 \pm 0.02^{bc}$  | $0.35 \pm 0.02^b$    |

Data are expressed as mean  $\pm$  standard deviation, mean values in a column with different letters (a–f) are significantly different.
