# Supplementary material for: Effects of Ultrasound-Assisted Immersion Freezing on the Protein Structure, Physicochemical Properties and Muscle Quality of the Bay Scallop (Argopecten irradians) during Frozen Storage
Source: MDPI journal article supplement (doi:10.3390/foods11203247), 2022-10-18
Supplement: s1 [file s1]

**Table S3.** Comprehensive score of control adductor muscle of scallop (AMS) and 90-day frozen stored AMS with different treatments.

| Variables       | PC1<br>(59.52%) | PC2<br>(28.82%) |
|-----------------|-----------------|-----------------|
| $\Delta H_1$    | 0.973           | -0.032          |
| $\alpha$ -helix | 0.928           | -0.364          |
| $T_{\max 1}$    | 0.923           | 0.17            |
| Thawing loss    | -0.923          | 0.323           |
| TVB-N           | -0.921          | 0.385           |
| Random coil     | -0.878          | 0.165           |
| Hardness        | 0.873           | -0.441          |
| Chewiness       | 0.868           | -0.271          |
| $\Delta H_2$    | 0.824           | -0.553          |
| TBARS           | -0.824          | 0.175           |
| Springiness     | 0.819           | -0.519          |
| MHC             | -0.262          | 0.911           |
| Actin           | -0.261          | 0.891           |
| $T_{\max 2}$    | 0.526           | -0.811          |
| $\beta$ -turn   | -0.581          | 0.761           |
| $\beta$ -sheet  | -0.314          | -0.659          |
