# Supplementary material for: Effects of Ultrasound-Assisted Immersion Freezing on the Protein Structure, Physicochemical Properties and Muscle Quality of the Bay Scallop (Argopecten irradians) during Frozen Storage
Source: MDPI journal article supplement (doi:10.3390/foods11203247), 2022-10-18
Supplement: s1 [file s1]

**Table S1.** Quantitative value of myosin heavy chain (MHC) and actin of myofibrillar proteins from the control adductor muscle of scallop (AMS) and 90-day frozen stored AMS with different treatments.

|         | MHC                    | Actin                  |
|---------|------------------------|------------------------|
| Control | 154 ± 0.5 <sup>f</sup> | 148 ± 1.5 <sup>e</sup> |
| AF      | 166 ± 1.8 <sup>d</sup> | 162 ± 1.2 <sup>c</sup> |
| IF      | 163 ± 0.5 <sup>e</sup> | 155 ± 1.2 <sup>d</sup> |
| UIF-100 | 197 ± 0.4 <sup>a</sup> | 186 ± 2.2 <sup>a</sup> |
| UIF-125 | 162 ± 0.9 <sup>e</sup> | 148 ± 2.2 <sup>e</sup> |
| UIF-150 | 163 ± 0.9 <sup>e</sup> | 145 ± 2.1 <sup>e</sup> |
| UIF-175 | 169 ± 0.7 <sup>c</sup> | 157 ± 0.6 <sup>d</sup> |
| UIF-200 | 189 ± 0.3 <sup>b</sup> | 177 ± 2.0 <sup>b</sup> |

Data are expressed as mean ± standard deviation, mean values in a column with different letters (a–f) are significantly different.
